# Supplementary material
Source: PubMed Central journal article supplement (PMC3186783)
Supplement: supp_djr333_JNCI_11_0380_s01.pdf [file supp_djr333_JNCI_11_0380_s01.pdf]

**Supplementary Table 1.** Prespecified subgroup analysis of the effect of estrogen plus progestin (E+P) on nonmelanoma skin cancer, stratified by characteristics at baseline\*

| Subgroup                           | E+P           |              | Placebo       |              | HR (95% CI)         | P    |
|------------------------------------|---------------|--------------|---------------|--------------|---------------------|------|
|                                    | No. of events | Annualized % | No. of events | Annualized % |                     |      |
| Overall                            | 494           | 1.05         | 486           | 1.11         | 0.95 (0.83 to 1.07) |      |
| Age, y                             |               |              |               |              |                     | .138 |
| 50–59                              | 108           | 0.65         | 104           | 0.67         | 0.96 (0.73 to 1.26) |      |
| 60–69                              | 246           | 1.18         | 217           | 1.11         | 1.06 (0.88 to 1.27) |      |
| 70–79                              | 140           | 1.49         | 165           | 1.84         | 0.79 (0.63 to 0.99) |      |
| Body mass index, kg/m <sup>2</sup> |               |              |               |              |                     | .853 |
| < 25                               | 189           | 1.33         | 183           | 1.36         | 0.96 (0.78 to 1.17) |      |
| ≥ 25                               | 303           | 0.93         | 303           | 1.00         | 0.93 (0.79 to 1.09) |      |
| Regional solar radiation, langleys |               |              |               |              |                     | .218 |
| ≤ 375                              | 260           | 1.03         | 236           | 1.01         | 1.02 (0.86 to 1.22) |      |
| > 375                              | 234           | 1.07         | 250           | 1.22         | 0.87 (0.73 to 1.04) |      |
| History of nonmelanoma skin cancer |               |              |               |              |                     | .217 |
| Yes                                | 132           | 5.52         | 109           | 5.03         | 1.09 (0.84 to 1.40) |      |
| No                                 | 362           | 0.81         | 377           | 0.90         | 0.90 (0.78 to 1.04) |      |
| Smoking status                     |               |              |               |              |                     | .678 |
| Never                              | 249           | 1.08         | 248           | 1.14         | 0.93 (0.78 to 1.11) |      |
| Past                               | 191           | 1.03         | 195           | 1.14         | 0.92 (0.75 to 1.13) |      |
| Current                            | 44            | 0.91         | 35            | 0.76         | 1.14 (0.73 to 1.78) |      |
| NSAID use at screening             |               |              |               |              |                     | .967 |
| Yes                                | 170           | 1.09         | 173           | 1.16         | 0.94 (0.76 to 1.16) |      |
| No                                 | 324           | 1.03         | 313           | 1.08         | 0.95 (0.81 to 1.11) |      |

\*Two-sided Wald static *P* values are from Cox proportional hazards models. HR = hazard ratio; CI = confidence interval; NSAID = nonsteroidal anti-inflammatory drug.

**Supplementary Table 2.** Pre-specified subgroup analysis of the effect of estrogen alone (E-alone) on nonmelanoma skin cancer, stratified by characteristics at baseline\*

| Subgroup                           | E-Along       |              | Placebo       |              | HR (95% CI)         | P    |
|------------------------------------|---------------|--------------|---------------|--------------|---------------------|------|
|                                    | No. of events | Annualized % | No. of events | Annualized % |                     |      |
| Overall                            | 406           | 1.12         | 414           | 1.11         | 1.03 (0.89 to 1.18) |      |
| Age, y                             |               |              |               |              |                     | .314 |
| 50–59                              | 69            | 0.58         | 73            | 0.60         | 0.97 (0.70 to 1.35) |      |
| 60–69                              | 181           | 1.12         | 202           | 1.22         | 0.94 (0.77 to 1.15) |      |
| 70–79                              | 156           | 1.89         | 139           | 1.65         | 1.18 (0.94 to 1.48) |      |
| Body mass index, kg/m <sup>2</sup> |               |              |               |              |                     | .236 |
| < 25                               | 114           | 1.51         | 96            | 1.28         | 1.18 (0.90 to 1.55) |      |
| ≥ 25                               | 291           | 1.02         | 316           | 1.07         | 0.97 (0.83 to 1.14) |      |
| Regional solar radiation, langleys |               |              |               |              |                     | .912 |
| ≤ 375                              | 191           | 1.08         | 197           | 1.09         | 1.03 (0.85 to 1.26) |      |
| > 375                              | 215           | 1.16         | 217           | 1.14         | 1.02 (0.84 to 1.23) |      |
| History of nonmelanoma skin cancer |               |              |               |              |                     | .161 |
| Yes                                | 76            | 5.13         | 101           | 6.07         | 0.85 (0.63 to 1.14) |      |
| No                                 | 330           | 0.95         | 313           | 0.88         | 1.08 (0.92 to 1.25) |      |
| Smoking status                     |               |              |               |              |                     | .512 |
| Never                              | 204           | 1.09         | 215           | 1.15         | 0.96 (0.79 to 1.16) |      |
| Past                               | 172           | 1.27         | 165           | 1.15         | 1.12 (0.91 to 1.39) |      |
| Current                            | 27            | 0.74         | 32            | 0.83         | 0.90 (0.54 to 1.50) |      |
| NSAID use at screening             |               |              |               |              |                     | .172 |
| Yes                                | 153           | 1.20         | 178           | 1.29         | 0.91 (0.74 to 1.13) |      |
| No                                 | 253           | 1.07         | 236           | 0.98         | 1.11 (0.93 to 1.33) |      |

\*Two-sided Wald static *P* values are from Cox proportional hazards models. HR = hazard ratio; CI = confidence interval; NSAID = nonsteroidal anti-inflammatory drug.

**Supplementary Table 3.** Pre-specified subgroup analysis of the effect of any hormone therapy (HT) on melanoma, stratified by characteristics at baseline\*

| Subgroup                           | Combined HT   |              | Placebo       |              | HR (95% CI)         | P    |
|------------------------------------|---------------|--------------|---------------|--------------|---------------------|------|
|                                    | No. of events | Annualized % | No. of events | Annualized % |                     |      |
| Overall                            | 46            | 0.05         | 49            | 0.06         | 0.92 (0.61 to 1.37) |      |
| Age, y                             |               |              |               |              |                     | .339 |
| 50–59                              | 12            | 0.04         | 16            | 0.06         | 0.73 (0.35 to 1.55) |      |
| 60–69                              | 22            | 0.06         | 16            | 0.04         | 1.34 (0.70 to 2.55) |      |
| 70–79                              | 12            | 0.06         | 17            | 0.09         | 0.70 (0.34 to 1.47) |      |
| Body mass index, kg/m <sup>2</sup> |               |              |               |              |                     | .867 |
| < 25                               | 12            | 0.05         | 12            | 0.06         | 0.99 (0.45 to 2.21) |      |
| ≥ 25                               | 34            | 0.05         | 36            | 0.06         | 0.92 (0.57 to 1.47) |      |
| Regional solar radiation, langleys |               |              |               |              |                     | .637 |
| ≤ 375                              | 26            | 0.06         | 25            | 0.06         | 1.00 (0.58 to 1.73) |      |
| > 375                              | 20            | 0.05         | 24            | 0.06         | 0.82 (0.46 to 1.49) |      |
| History of nonmelanoma skin cancer |               |              |               |              |                     | .922 |
| Yes                                | 7             | 0.15         | 7             | 0.15         | 0.96 (0.33 to 2.75) |      |
| No                                 | 39            | 0.05         | 42            | 0.05         | 0.91 (0.59 to 1.40) |      |
| Smoking status                     |               |              |               |              |                     | .341 |
| Never                              | 26            | 0.06         | 25            | 0.06         | 1.01 (0.59 to 1.76) |      |
| Past                               | 19            | 0.06         | 19            | 0.06         | 0.97 (0.51 to 1.83) |      |
| Current                            | 1             | 0.01         | 5             | 0.06         | 0.19 (0.02 to 1.66) |      |
| NSAID use at screening             |               |              |               |              |                     | .747 |
| Yes                                | 19            | 0.06         | 22            | 0.08         | 0.85 (0.46 to 1.57) |      |
| No                                 | 27            | 0.05         | 27            | 0.05         | 0.97 (0.57 to 1.66) |      |

\*Two-sided Wald static *P* values are from Cox proportional hazards models. HR = hazard ratio; CI = confidence interval; NSAID = nonsteroidal anti-inflammatory drug.
